# Supplementary material
Source: publisher figshare collection journal article supplement (https://acs.figshare.com/ndownloader/files/3964537)
Supplement: Supplementary file 1 [file 3964537]

**Figure S1**

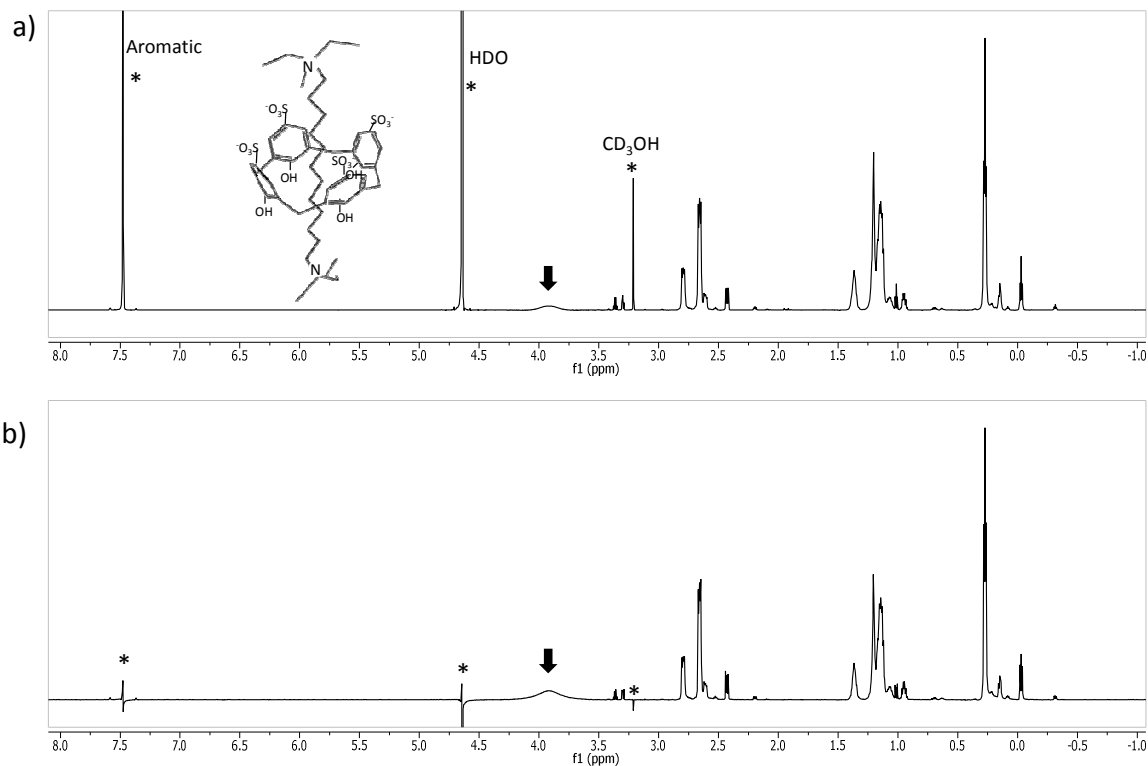

**Figure S1.** Spectra of sulfo(4)calixarene and dodecane 1,12-bis (triethylammonium bromide) surfactant 1:1 dissolved in a mixture of solvents  $\text{D}_2\text{O}/\text{CD}_3\text{OD}$ . a)  $1\text{D } ^1\text{H}$  spectrum and b)  $1\text{D s-filter}^{\text{rev}}$  with a mixing time of 75 ms. The position of the singlets peaks is indicated with an asterisk. The signal indicated with an arrow corresponds to a broad multiplet peak with relatively much shorter  $T_2$  relaxation time than the other signals.

**Figure S2**

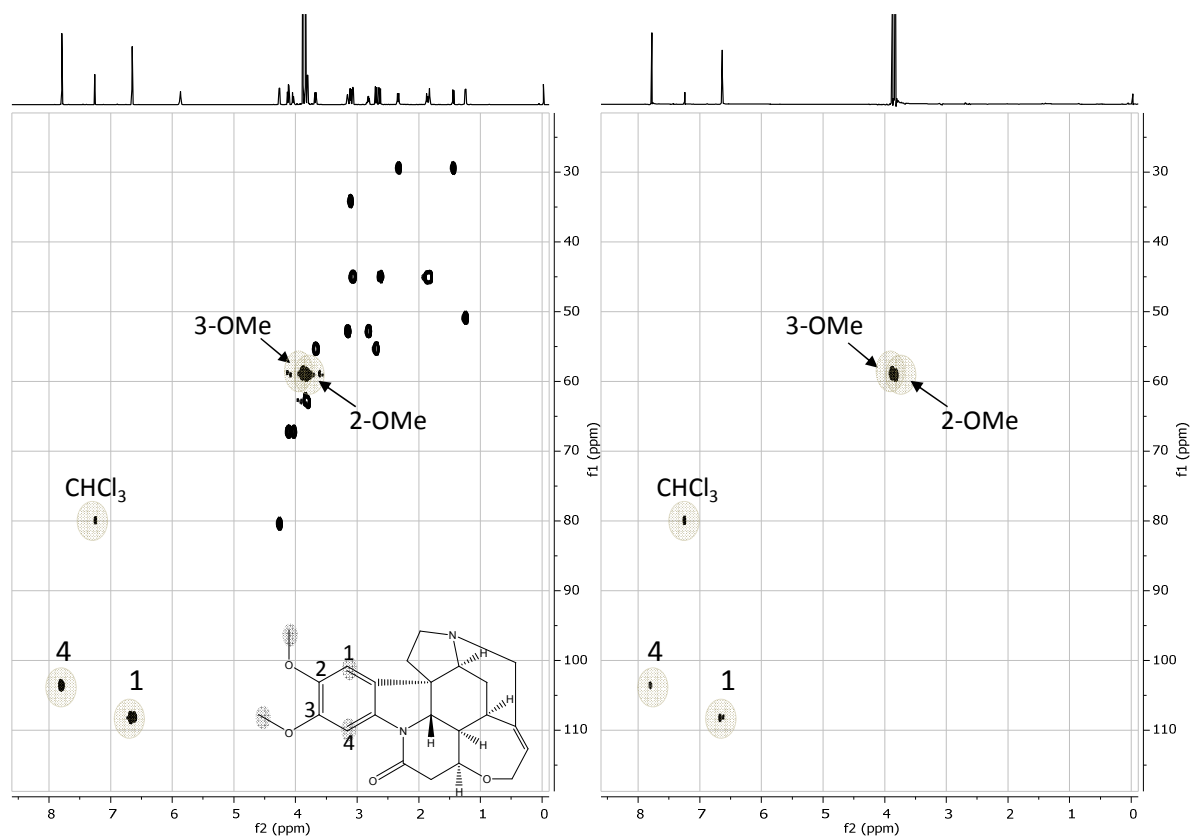

**Figure S2.** Spectra of brucine in  $\text{CDCl}_3$ . a) 2D  $^1\text{H}$ - $^{13}\text{C}$  HSQC, b) 2D s-filtered  $^1\text{H}$ - $^{13}\text{C}$  HSQC using the parameters of Table 1 for a number of cycles  $n=3$ . The shaded signals correspond to the singlet peaks.

**Figure S3**

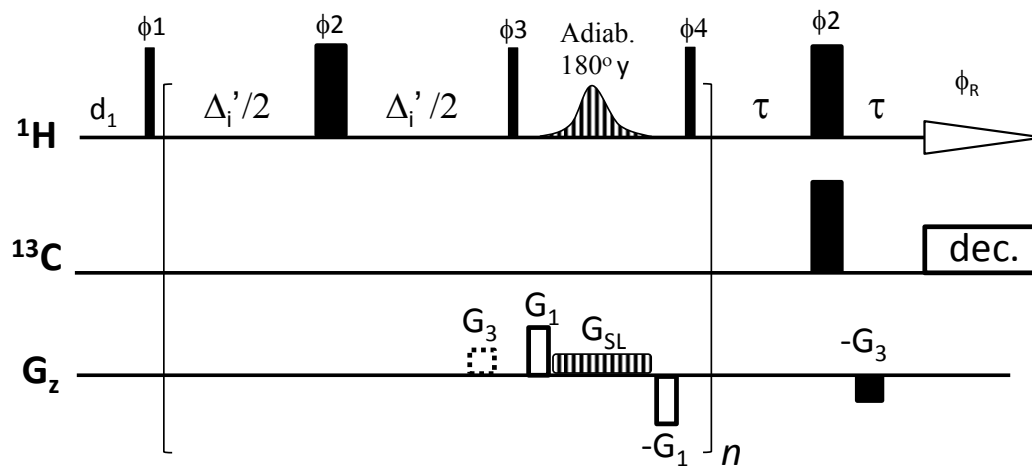

**Figure S3.** Pulse sequence 1D  $^1\text{H}$  s-filter experiment with inversion of proton signals attached to  $^{13}\text{C}$  (e.g.  $^{13}\text{C}$  satellites). Narrow and wide lines correspond to hard pulses of  $90^\circ$  and  $180^\circ$ , respectively. Other experimental details are identical to those described for the pulse sequence of Fig. 1b.

**Figure S4**

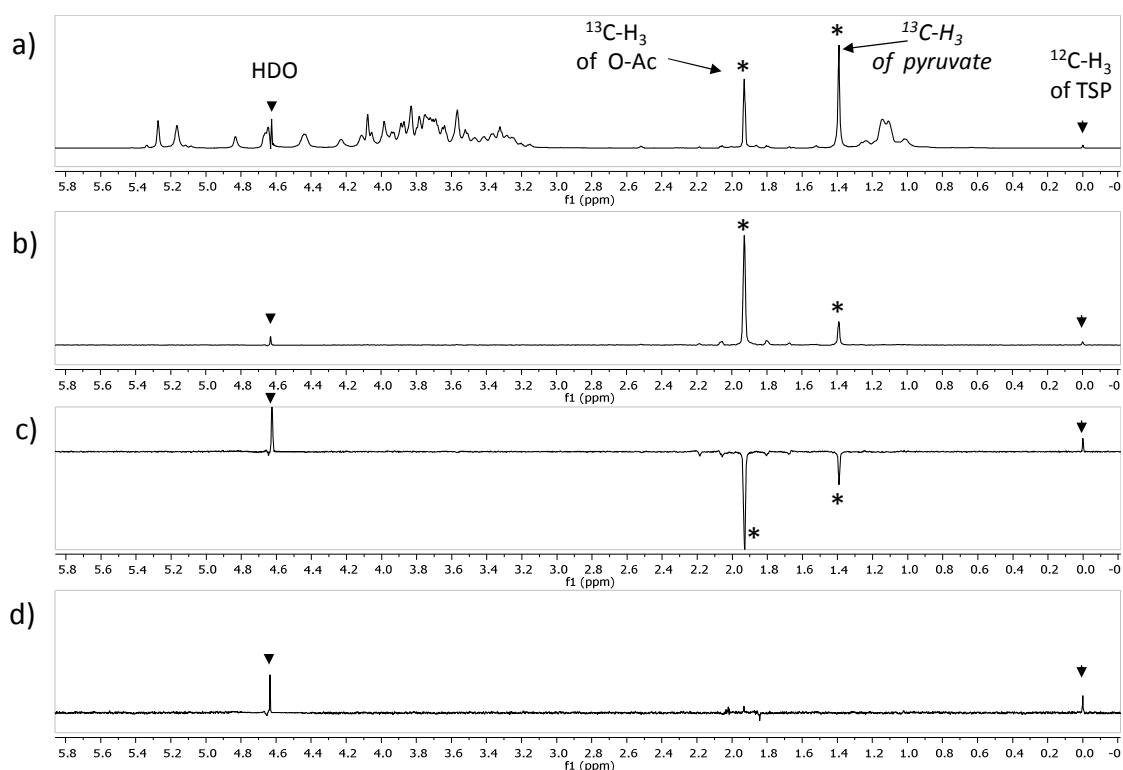

**Figure S4.**  $^1\text{H}$  s-filter experiments for the edition or suppression of the responses of proton singlet peaks bound to  $^{13}\text{C}$  respect to proton singlets bound to other type of nuclei (e.g.  $^{12}\text{C}$ ). The spectra were obtained for a sample of uniformly  $^{13}\text{C}$  labelled exo-polysaccharide colanic acid in  $\text{D}_2\text{O}$  containing 0.03% of TSP. a)  $^1\text{H}$   $\{^{13}\text{C}\}$  decoupled experiment, b)  $^1\text{H}$  s-filter $^4$   $\{^{13}\text{C}\}$  decoupled experiment (pulse sequence of Fig. 1a). c)  $^1\text{H}$  s-filter $^4$   $\{^{13}\text{C}\}$  decoupled experiment with inversion of protons bound to  $^{13}\text{C}$  (pulse sequence of Fig. S3). d)  $^1\text{H}$  s-filter $^4$   $\{^{13}\text{C}\}$  decoupled experiment with suppression of protons bound to  $^{13}\text{C}$  (pulse sequence of Fig. 1b). In these spectra the signals of four singlet peaks are indicated. The signals labelled with asterisks correspond to the methyl protons of acetyl and di-substituted pyruvate groups of  $\text{U-}^{13}\text{C}$  colanic acid. These methyl protons are bound to  $^{13}\text{C}$  and uncoupled to other protons. The two singlet peaks labelled with arrows are protons that are not bound to  $^{13}\text{C}$ , they correspond to HDO and to methyl protons of TSP bound to  $^{12}\text{C}$  (i.e. natural abundance). The four spectra were obtained with 128 using soft presaturation of HDO signal and with broad-band *Garp*  $^{13}\text{C}$  decoupling during acquisition. The  $^1\text{H}$ -sfilter spectra b) to d) used the conditions described in Fig. 1 and Table 1 for a number of cycles  $n=4$  and a nominal value of  $J_{\text{CH}}$  of 130 Hz. The signal assignment of colanic acid can be found in the following reference: Meredith C. T.; Mamat, U.; Kaczynski, Z.; Lindner, B.; Holst, O.; Woodard, R.W.

Modification of Lipopolysaccharide with Colanic Acid (M-antigen) Repeats in Escherichia coli. *J. Biol. Chem.*, **2007**, 282, 7790-7798.

**Table S1. Metabolites described for wine samples that generate singlets or small  $^nJ_{HH}$  scalar couplings ( $J \leq 3$  Hz) in the 1D proton spectrum. These signals can be edited in the  $^1H$  s-filter spectrum of the sample.**

| Compound                     | $\delta^1H$ in ppm<br>(number of protons, multiplicity, J in Hz, assignment,) <sup>a</sup>                 | Ref. | HMDB code <sup>(a)</sup> |
|------------------------------|------------------------------------------------------------------------------------------------------------|------|--------------------------|
| formic acid                  | 8.32 (1, s, H-2)                                                                                           | (c)  | HMDB00142                |
| Quercetin                    | 7.74 (1, d, H-12, J=2.02), 6.40 (1, d, H-7, J $\leq$ 3), 6.19 (1, d, H-9, J $\leq$ 3)                      | (d)  | HMDB05794                |
| syringic acid                | 7.32 (2, s, H-5, H-3), 3.87 (3+3, s, H-9, H-13)                                                            | (d)  | HMDB02085                |
| gallic acid                  | 7.08 (2, s, H-3, H-5)                                                                                      | (d)  | HMDB05807                |
| (-)-epicatechin              | 6.97 (1, d, H-12, J=1.24), 5.94 (1, d, H-7, J=2.1), 5.92 (1, d, H-9, J=1.97), 4.81 (1, d, H-2, J $\leq$ 3) | (d)  | HMDB01871                |
| (+)-catechin                 | 6.84 (1, d, H-12, J=1.98), 5.93 (1, d, H-7, J=2.26), 5.85 (1, d, H-9, J=2.26)                              | (d)  | HMDB02780                |
| kaempferol                   | 6.41 (1, d, H-19, J=2.09), 6.18 (1, d, H-17, J=2.09)                                                       | (d)  | HMDB05801                |
| tartaric acid <sup>(b)</sup> | 4.41 (2, s, CH-4, CH-6)                                                                                    | (c)  | HMDB00956                |
| ferulic acid                 | 3.90 (3, s, H-8)                                                                                           | (d)  | HMDB00954                |
| Methanol                     | 3.35 (3, s, H-2)                                                                                           | (c)  | HMDB01875                |
| succinic acid                | 2.62 (2+2, s, H-4, H-5)                                                                                    | (c)  | HMDB00254                |
| pyruvic acid <sup>(b)</sup>  | 2.35 (3, s, H-6)                                                                                           | (c)  | HMDB00243                |
| acetone                      | 2.2 (3+3, s, H-3, H-4)                                                                                     | (c)  | HMDB01659                |
| acetic acid/acetates         | 2.06 (3, s, H-4)                                                                                           | (c)  | HMDB00042                |

(a) Coupling constants (J) and signal assignments corresponds to the  $^1H$  NMR data of the compound in the Human Metabolome Database (HMDB): <http://www.hmdb.ca>.

(b) Tentative identification.

(c) Chemical shifts extracted from Table 1 of ref. 5.

(d) Chemical shifts extracted from Table 2 of ref. 4.

**Table S2. Metabolites described for olive oil samples that generate singlets or small  $^nJ_{HH}$  scalar couplings ( $J \leq 3$  Hz) in the 1D proton spectrum. These signals can be edited in the  $^1H$  s-filter spectrum of the sample.**

| Compound                      | $\delta \text{ } ^1H$ in ppm <sup>(a)</sup> |
|-------------------------------|---------------------------------------------|
|                               | (number of protons, multiplicity, J in Hz)  |
| -Ph- <i>H</i> (phenolic ring) | 6.970 (1, s)                                |
| Terpene                       | 4.699 (1, s)                                |
| Terpene                       | 4.648 (1, s)                                |
| squalene                      | 1.662 (3, s)                                |
| stigmasterol                  | 0.687 (3, s)                                |
| $\beta$ -sitosterol           | 0.669 (3, s)                                |

*(a) Chemical shifts and coupling pattern extracted from Table 1 of ref. 12.*
